# Supplementary material for: Single-Cell Immune Competency Signatures Associate with Survival in Phase II GVAX and CRS-207 Randomized Studies in Patients with Metastatic Pancreatic Cancer
Source: Oxford University Press journal article supplement (doi:10.1158/2326-6066.cir-19-0650), 2020-03-04
Supplement: 23266066cir190650-sup-227867_2_supp_6051132_q4sf1w.docx [file 23266066cir190650-sup-227867_2_supp_6051132_q4sf1w.docx]

Fig. S2.


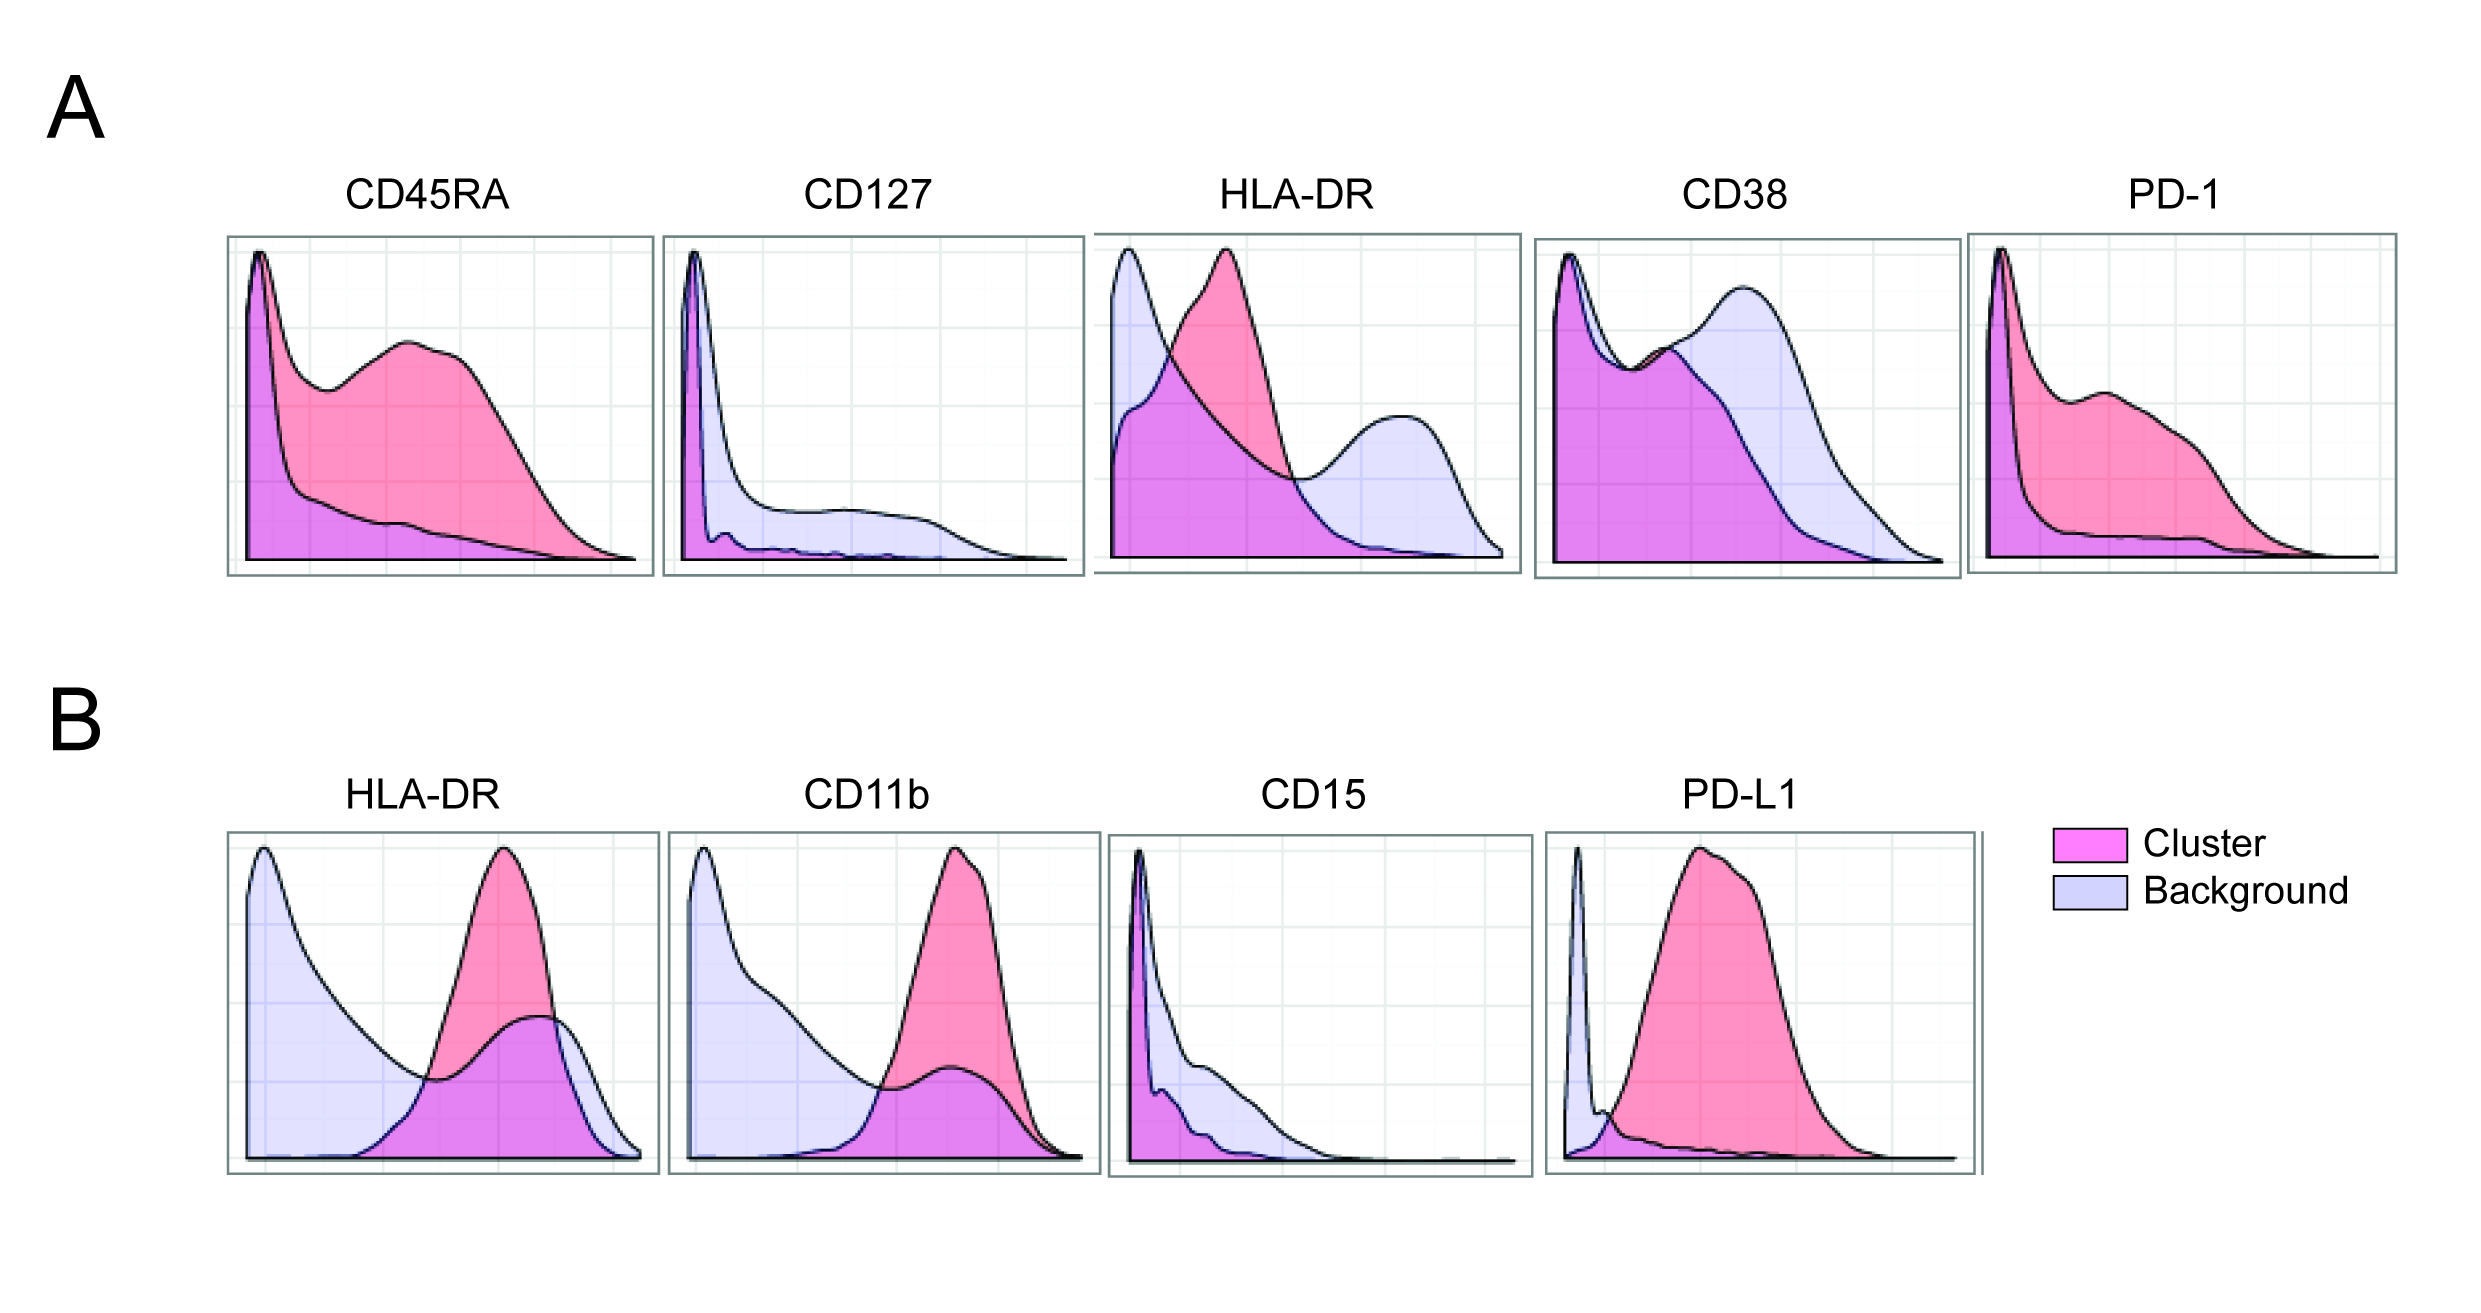


**Fig. S2.** Expression of additional markers in two candidate immune cell subsets associated with clinical outcome at baseline in pancreatic cancer patients. Histogram representation of additional cell surface marker expression in the **A.** CD8 and **B.** myeloid immune cell subsets associated with clinical outcome (pink) compared to total, live DNA+ cells (purple).
