# Supplementary material for: Single-Cell Immune Competency Signatures Associate with Survival in Phase II GVAX and CRS-207 Randomized Studies in Patients with Metastatic Pancreatic Cancer
Source: Oxford University Press journal article supplement (doi:10.1158/2326-6066.cir-19-0650), 2020-03-04
Supplement: 23266066cir190650-sup-227867_2_supp_6051134_q4sf1w.docx [file 23266066cir190650-sup-227867_2_supp_6051134_q4sf1w.docx]

# Fig. S4.

**
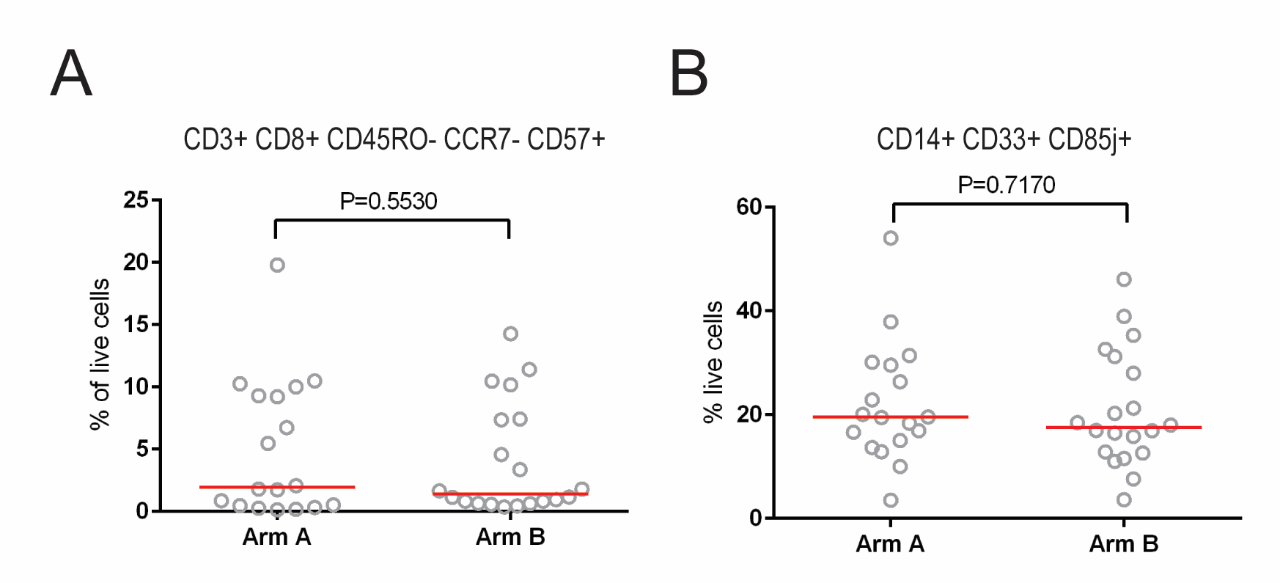
**

**Fig. S4. Training set patient sub-cohort is balanced in terms of candidate biomarker abundance at baseline.** The frequency of CD8+CD45RO-CCR7-CD57+ and CD14+CD33+CD85j+ cells in Arm A and Arm B patients. Dots represent individual patient values; lines represent median values. P values were determined by Unpaired t test.
