# Supplementary material for: Single-Cell Immune Competency Signatures Associate with Survival in Phase II GVAX and CRS-207 Randomized Studies in Patients with Metastatic Pancreatic Cancer
Source: Oxford University Press journal article supplement (doi:10.1158/2326-6066.cir-19-0650), 2020-03-04
Supplement: 23266066cir190650-sup-227867_2_supp_6051137_q4sf1w.docx [file 23266066cir190650-sup-227867_2_supp_6051137_q4sf1w.docx]

**Fig. S6.**


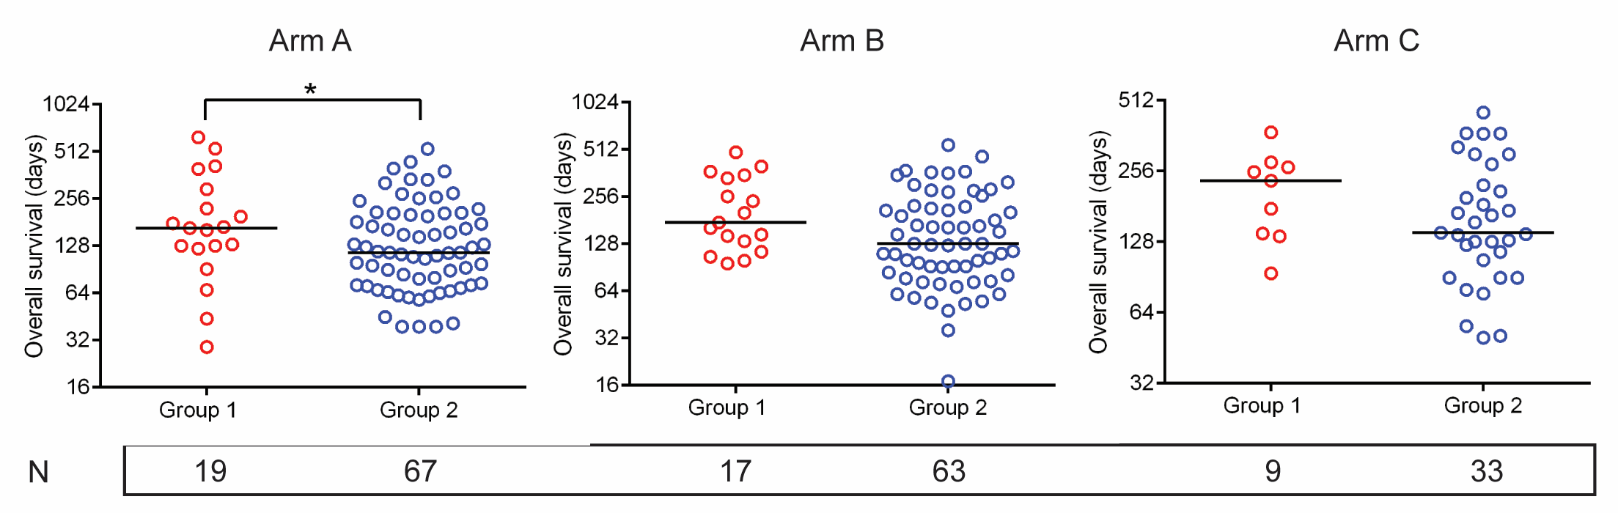


**Fig. S6. Cellular biomarkers are independent of treatment in the validation patient cohort.** Overall survival for patients in Group 1 and Group 2 in the three treatment arms of the study. The number of patients included in each group is represented below each graph. Dots represent individual patient values; lines represent the median. P values were determined by Unpaired t test. *P<0.05.
